# Supplementary material for: The chemokine receptor CXCR4 promotes granuloma formation by sustaining a mycobacteria-induced angiogenesis programme
Source: PubMed Central journal article supplement (PMC5362882; doi:10.1038/srep45061), 2017-03-23
Supplement: srep45061-s1.pdf [file srep45061-s1.pdf]

**The chemokine receptor CXCR4 promotes  
granuloma formation by sustaining a mycobacteria-  
induced angiogenesis programme**

Vincenzo Torraca, Claudia Tulotta, B. Ewa Snaar-Jagalska and Annemarie  
H. Meijer\*

**Affiliation**

*Institute of Biology, Leiden University, The Netherlands*

**\* Corresponding Author:**

prof. dr. Annemarie H. Meijer

e-mail: [a.h.meijer@biology.leidenuniv.nl](mailto:a.h.meijer@biology.leidenuniv.nl)

address: Institute of Biology, Leiden University, Einsteinweg 55, 2333 CC,  
Leiden, The Netherlands

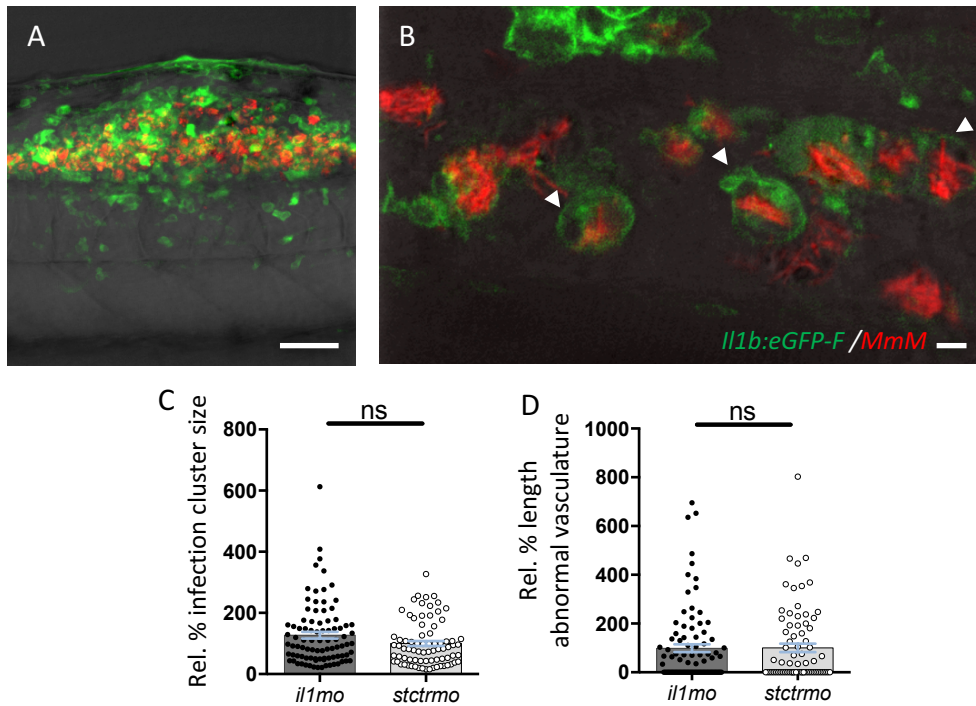

## Supplementary Figure S1

**Supplementary Figure S1. Function of *il1b* on trunk granulomas.** **A-B.** Induction of the proangiogenic inflammatory mediator *il1b* at the trunk granuloma. The large granuloma forming in the trunk contains a high number of *il1b*-expressing cells, predominantly consisting of infected cells. Confocal images were acquired at 5 dpi from infected *Tg(il1b:eGFP-F)* larvae. Scale bars: A: 50  $\mu$ m; B: 5  $\mu$ m. **C-D.** Despite being largely induced in infected cells during trunk granuloma formation, and notably suppressed by *cxc4b* mutation, depletion of *il1b* does not recapitulate *cxc4b* phenotype in granuloma vascularisation, since *il1b* morphants could still develop normally vascularise granulomas. Data were obtained and analysed as in Figure 3I-J (2 replicates, cumulated).

**Supplementary Table S1.** Primers used for qRT-PCR in this study.

| Gene            | Transcript reference                     | qRT-PCR Fw (5'-3')            | qRT-PCR Rv (5'-3')           | Ref.                             |
|-----------------|------------------------------------------|-------------------------------|------------------------------|----------------------------------|
| <i>vegfaa</i>   | ENSDART00000167719                       | TGCTCCTGCAAATT<br>CACACAA     | ATCTTGGCTTTT<br>CACATCTGCAA  | Li <i>et al.</i> 2012            |
| <i>cxcr4b</i>   | ENSDART00000061499                       | GCGACCTCTCAGT<br>CAGCAAT      | TCACAAGCACC<br>ACAAGTCCA     | -                                |
| <i>cxcl12a</i>  | ENSDART00000053946                       | GCTGGTGCCGTTT<br>CACAGTCA     | GGGGCAGTTGG<br>GTGTGTGGAG    | -                                |
| <i>tnfa</i>     | ENSDART00000025847                       | AGACCTTAGACTG<br>GAGAGATGAC   | CAAAGACACCT<br>GGCTGTAGAC    | Stockhammer <i>et al.</i> 2009   |
| <i>cxcl11aa</i> | ENSDART00000169606                       | ACTCAACATGGTG<br>AAGCCAGTGCT  | CTTCAGCGTGGC<br>TATGACTTCCAT | Torraca <i>et al.</i> 2015       |
| <i>cxcl18b</i>  | ENSDART00000111598                       | TCTTCTGCTGCTGC<br>TTGCGGT     | GGTGTCCCTGCG<br>AGCACGAT     | Van der Vaart <i>et al.</i> 2013 |
| <i>il1b</i>     | ENSDART00000169225                       | GAACAGAATGAAG<br>CACATCAAACC  | ACGGCACTGAAT<br>CCACCAC      | Stockhammer <i>et al.</i> 2009   |
| <i>mmp9</i>     | ENSDART00000062845                       | CATTAAAGATGCCC<br>TGATGTATCCC | AGTGGTGGTCCG<br>TGGTTGAG     | Stockhammer <i>et al.</i> 2009   |
| <i>ppiab</i>    | ENSDART00000166085                       | AACTGAAACACG<br>GAGGCAAAG     | CATCCACAACCT<br>TCCCGAACAC   | Stockhammer <i>et al.</i> 2009   |
| <i>eif4a1b</i>  | ENSDART00000140602<br>ENSDART00000011878 | TTCAGAACTCAG<br>TACTAGCATACA  | GTGACATCCAAC<br>ACCTCTGC     | Benard <i>et al.</i> 2015        |
